# Supplementary material for: Technical note: Isolating methane emissions from animal feeding operations in an interfering location
Source: Copernicus journal article supplement (doi:10.5194/acp-23-7479-2023), 2023-07-10
Supplement: Supplementary file 1 [file acp-23-7479-2023-supplement.pdf]

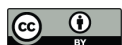

*Supplement of*

## **Technical note: Isolating methane emissions from animal feeding operations in an interfering location**

**Megan E. McCabe et al.**

*Correspondence to:* Dana R. Caulton ([dcaulton@uwyo.edu](mailto:dcaulton@uwyo.edu))

The copyright of individual parts of the supplement might differ from the article licence.

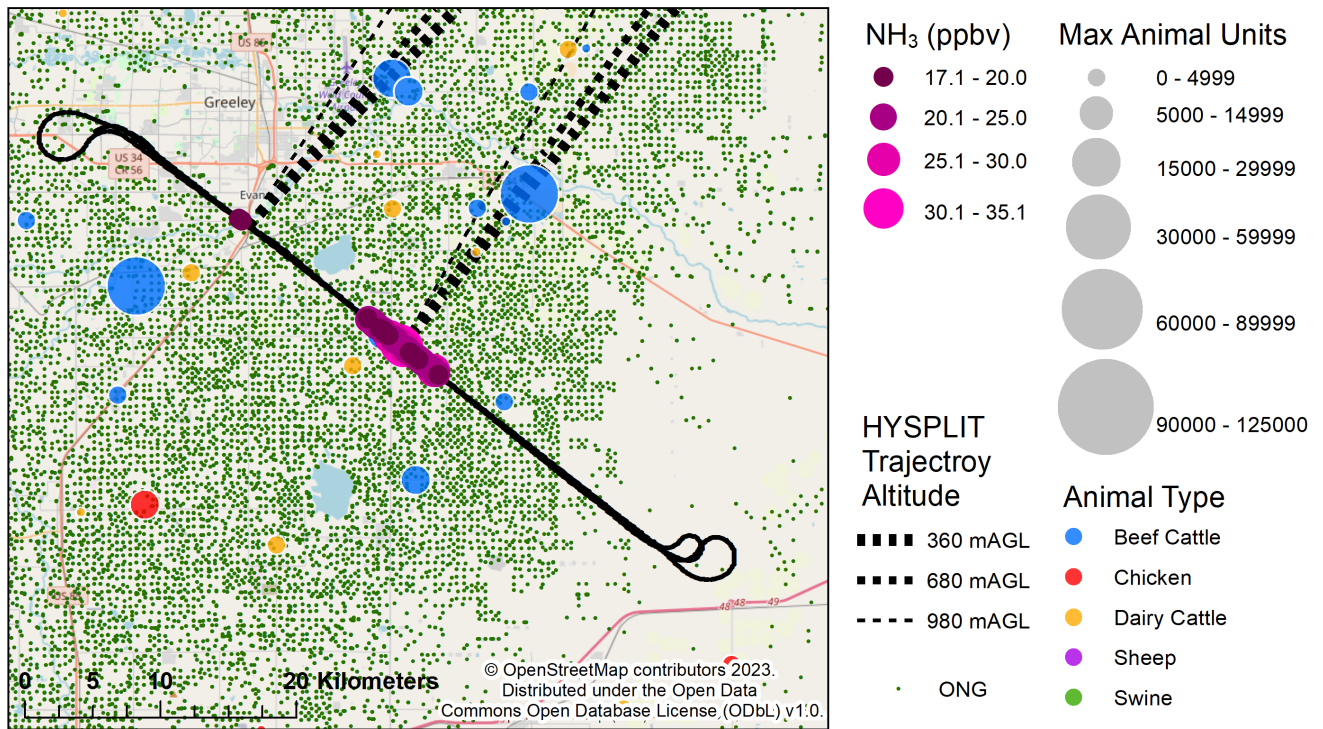

**Figure S1.** Back trajectory plot for flight F2, on November 13, 2019. The flight track is colored in black, with the largest 4% of NH<sub>3</sub> observations colored in pink to show the two separate plumes. HYSPLIT back trajectories are shown originating from the center of each NH<sub>3</sub> plume for three altitudes. Animal operations are indicated by the different colored circles as in Figure 1. Green dots represent ONG wells, data of ONG as of 2015 (Colorado Department of Natural Resources Oil & Gas Conservation Commission, 2016).

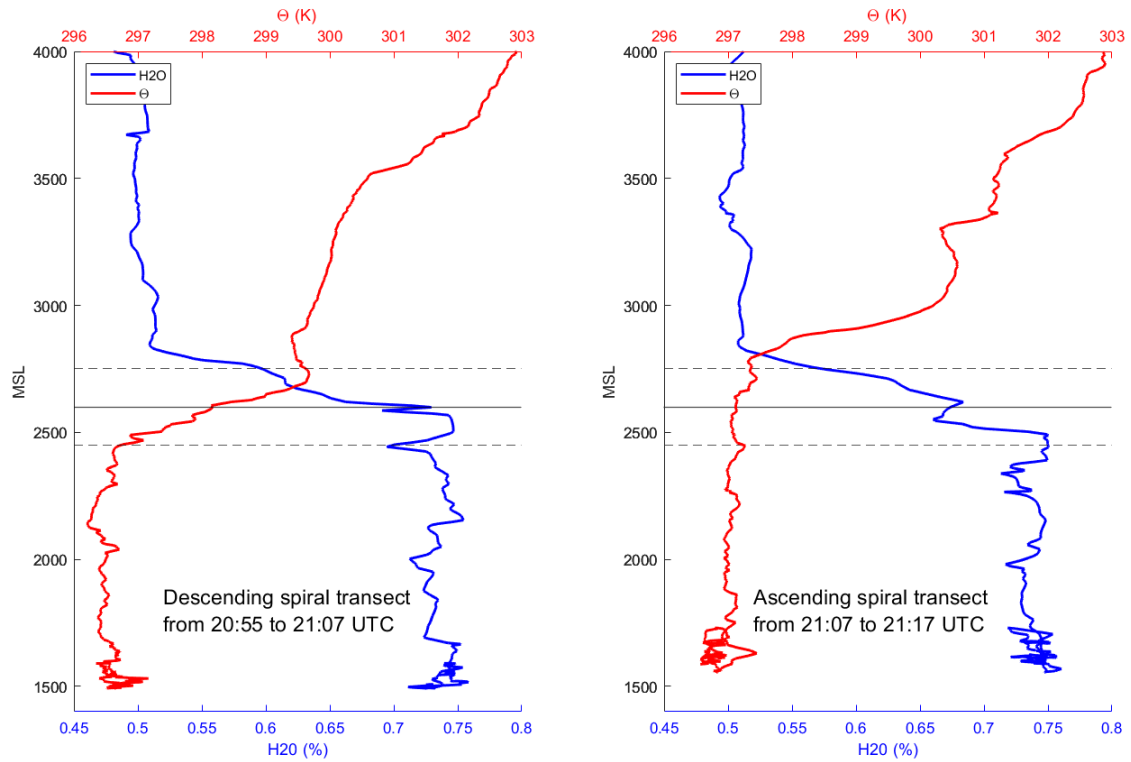

**Figure S2.** Descending spiral transect (left) followed by an ascending spiral (right) transect to show the MLB during flight 2 (F2) conducted on November 13, 2019. Potential temperature ( $\theta$ , red) and water vapor (H<sub>2</sub>O, blue) were used to determine the mixed MBL. The dotted line represents the selected MBL used in calculations.

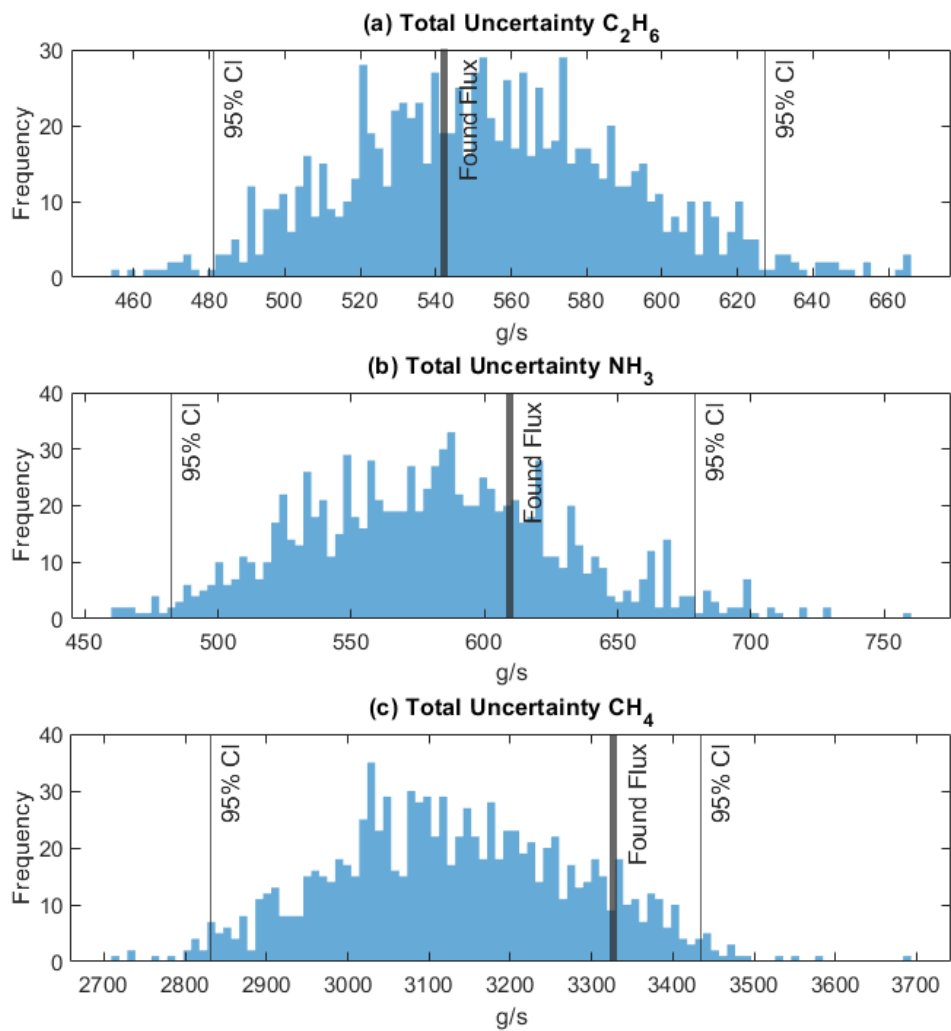

**Figure S3.** Total uncertainty based on Monte Carlo. (a) Total uncertainty  $C_2H_6$ . (b) Total uncertainty of  $NH_3$ . (c) Total uncertainty of total  $CH_4$ .

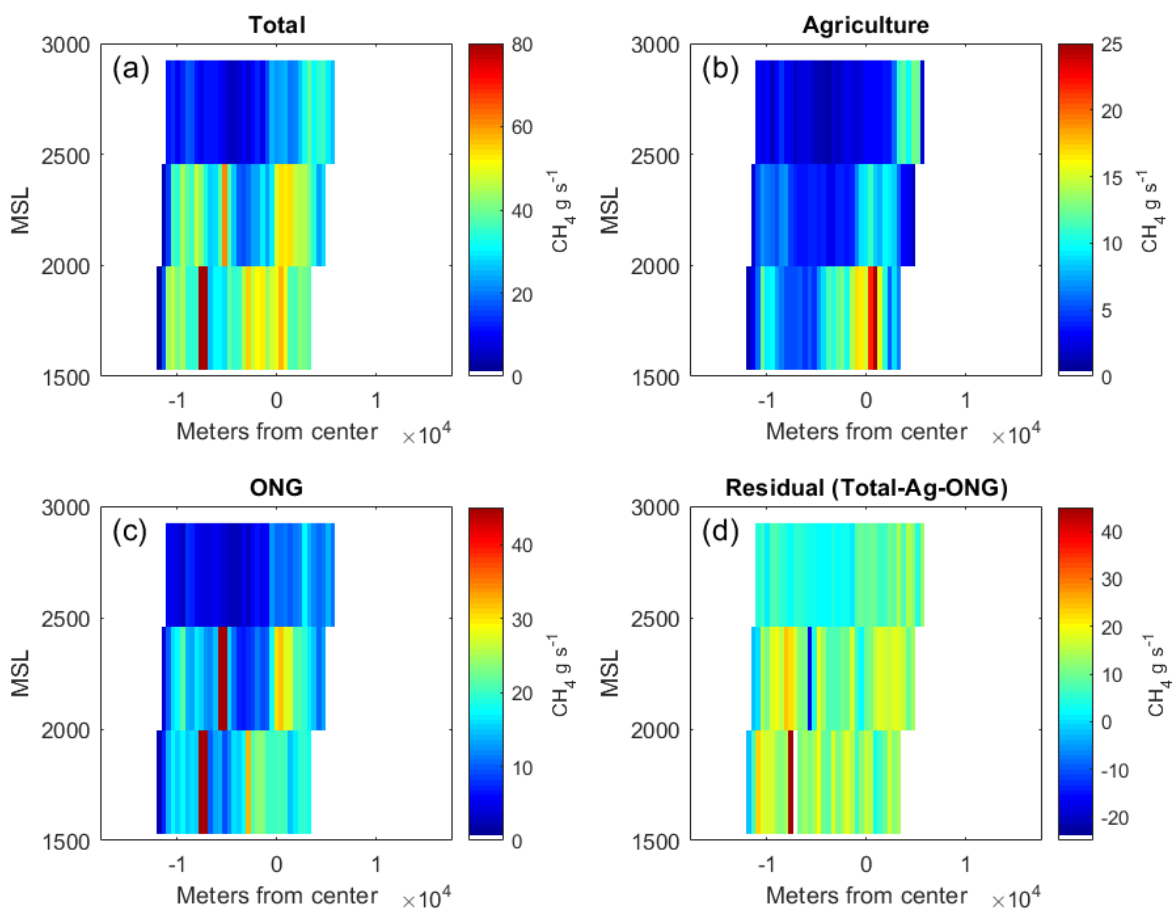

**Figure S4.** Curtain plots of  $\text{CH}_4$  emission by point. (a) Total emissions by point. (b) Agriculture emissions. (c) ONG emissions. (d) Any remaining emissions that are not accounted for in ONG and agriculture.

**Table S1.** Sensitivity of the MVR fit for Transect data.

| Transect MVR Approaches                                                                 | a                 | b           | c         | R <sup>2</sup> |
|-----------------------------------------------------------------------------------------|-------------------|-------------|-----------|----------------|
| Raw CH <sub>4</sub>                                                                     | 1933.2±0.6        | 1.090±0.072 | 5.73±0.10 | 0.74           |
| Background subtracted CH <sub>4</sub>                                                   | 0.6±0.6 (1933.2)  | 1.090±0.072 | 5.73±0.10 | 0.74           |
| Background subtracted C <sub>2</sub> H <sub>6</sub> & NH <sub>3</sub>                   | 1945.9±0.4        | 1.090±0.072 | 5.73±0.10 | 0.74           |
| Background subtracted CH <sub>4</sub> , C <sub>2</sub> H <sub>6</sub> & NH <sub>3</sub> | 13.3±0.4 (1945.9) | 1.090±0.072 | 5.73±0.10 | 0.74           |

Background subtracted CH<sub>4</sub> - 1932.6 (found from around the transects.)

**Table S2.** Sensitivity of the MVR fit for F2 data.

| F2 MVR Approaches                                                                       | a                 | b           | c           | R <sup>2</sup> |
|-----------------------------------------------------------------------------------------|-------------------|-------------|-------------|----------------|
| Raw CH <sub>4</sub>                                                                     | 1933.2±0.2        | 0.638±0.010 | 6.329±0.051 | 0.78           |
| Background subtracted CH <sub>4</sub>                                                   | 0.6±0.2 (1933.2)  | 0.638±0.010 | 6.329±0.051 | 0.78           |
| Background subtracted C <sub>2</sub> H <sub>6</sub> & NH <sub>3</sub>                   | 1945.2±0.2        | 0.638±0.010 | 6.329±0.051 | 0.78           |
| Background subtracted CH <sub>4</sub> , C <sub>2</sub> H <sub>6</sub> & NH <sub>3</sub> | 12.6±0.2 (1945.2) | 0.638±0.010 | 6.329±0.051 | 0.78           |

Background subtracted CH<sub>4</sub> - 1932.6 (found from around the transects).

**Table S3.** Attribution method fit statistics.

| Approach | Data            | a           | b           | c            | R <sup>2a</sup> | Average Residual | Normalized Sum of Residual <sup>2b</sup> |
|----------|-----------------|-------------|-------------|--------------|-----------------|------------------|------------------------------------------|
| SM       | F2 <sup>2</sup> | 1932.6 ± 33 | 1.2         | 9.1          | 0.20            | -14              | 3.02                                     |
| SM       | Transect        | 1932.6 ± 33 | 2.22        | 6.8          | 0.47            | -11              | 2.04                                     |
| MVR      | F2              | 1933.2±0.6  | 0.638±0.010 | 6.329±0.051  | 0.72            | -9               | 1.87                                     |
| MVR      | Transect        | 1933.2±0.2  | 1.090±0.072 | 5.729 ±0.095 | 0.74            | 1                | 1.0                                      |

<sup>a</sup> Calculated R<sup>2</sup> on the transect data at 1 Hz. <sup>b</sup> The normalized Sum of Residual<sup>2</sup> is calculated by dividing each approach's Sum of Residual<sup>2</sup> by the minimum value (i.e., the value from the MVR Transect approach).

**Table S4.** RF13 Subtraction Method Results

| Transect Number | Distance from Feedlot (km) | CAFO CH <sub>4</sub> (g s <sup>-1</sup> ) | Uncertainty (g s <sup>-1</sup> ) | Relative Uncertainty (%) |
|-----------------|----------------------------|-------------------------------------------|----------------------------------|--------------------------|
| 1               | 2.8                        | 181                                       | 130                              | 72                       |
| 2               | 5.5                        | 583                                       | 184                              | 32                       |
| 3               | 11.1                       | 489                                       | 206                              | 42                       |
| 4               | 12.9                       | 627                                       | 367                              | 58                       |
| 5               | 16.8                       | 701                                       | 170                              | 24                       |
| Average         | 9.8                        | 516                                       | 208                              | 40                       |

## References

Colorado Department of Natural Resources Oil & Gas Conservation Commission: Colorado Oil and Gas Information System (COGIS), [www.colorado.gov/pacific/cdphe/animal-and-livestock-feeding-operations](http://www.colorado.gov/pacific/cdphe/animal-and-livestock-feeding-operations), accessed: April, 2016, 2016.
